# Supplementary material for: Dramatic Survival Benefit Related to R0 Resection of Pancreatic Adenocarcinoma in Patients With Tumor ≤25 mm in Size and ≤1 Involved Lymph Nodes
Source: PubMed Central journal article supplement — Clin Transl Gastroenterol. 2013 Mar 21;4(3):e33–. doi: 10.1038/ctg.2013.4 (PMC3615697; doi:10.1038/ctg.2013.4), 2013-03-21
Supplement: ctg20134x1.pdf [file ctg20134x1.pdf]

Supplemental data:

Overall survival R0 vs. R1 in tumors  $\leq 20$  mm

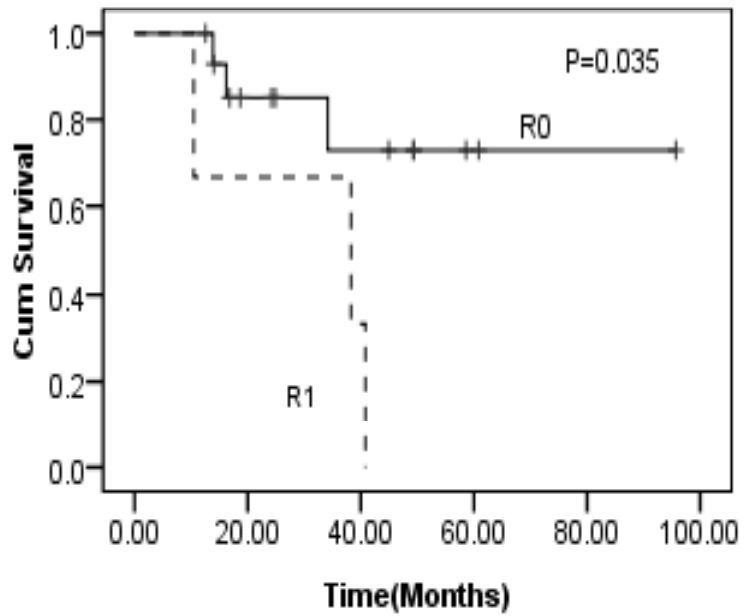

Overall survival R0 vs. R1 in tumors 21-25 mm

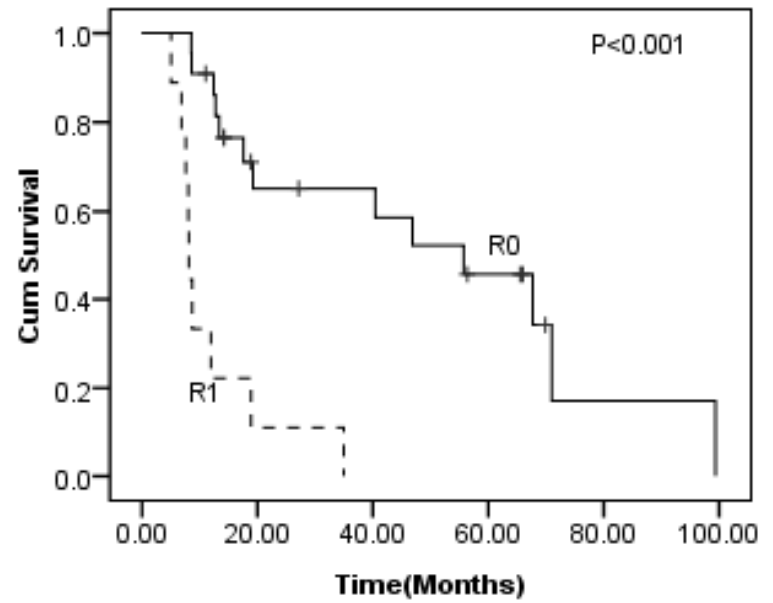

Supplemental data (cont'd):

Overall survival R0 vs. R1 in tumors 26-30 mm

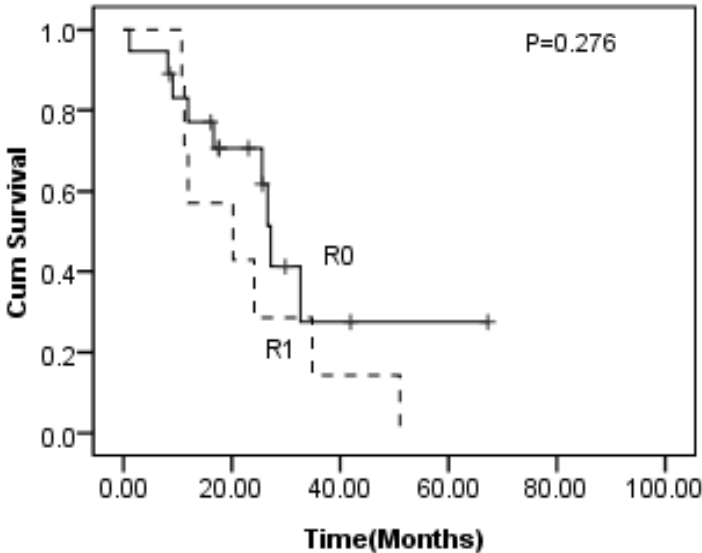

Overall survival R0 vs. R1 in tumors 31-35 mm

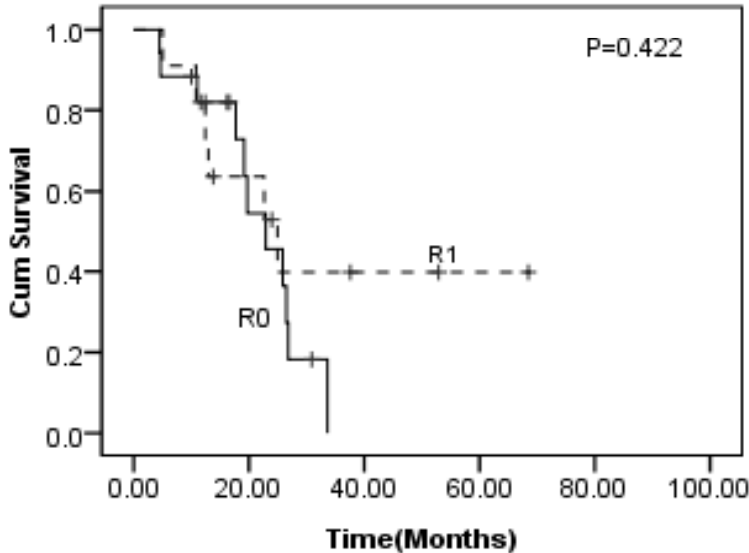

Supplemental data (cont'd):

Overall survival R0 vs. R1 in tumors 36-40 mm

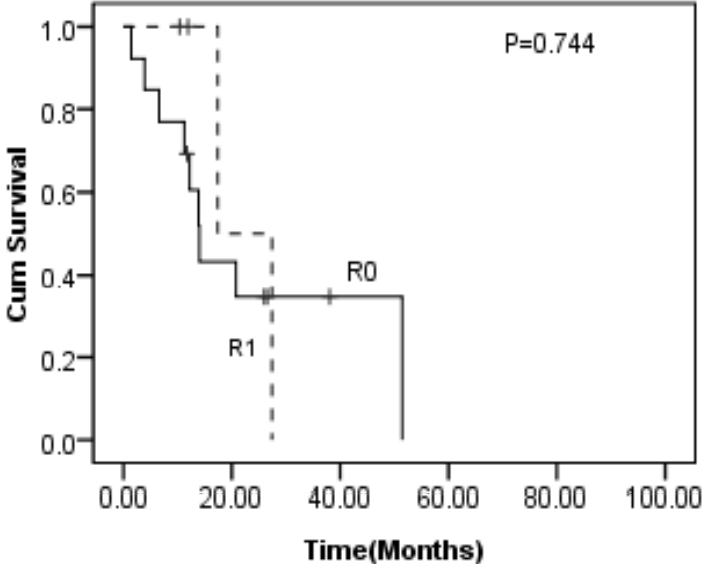

Overall survival R0 vs. R1 in tumors >40 mm

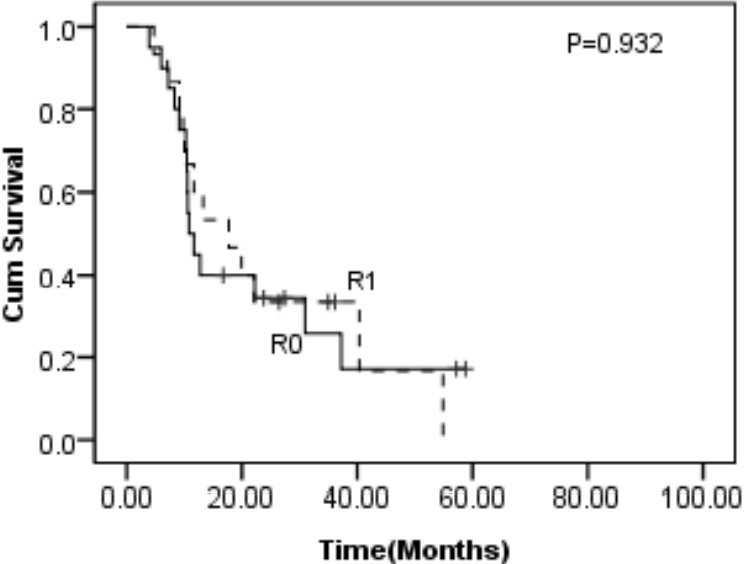

Supplemental figure:

Cumulative survival following upfront surgical resection of pancreatic cancer

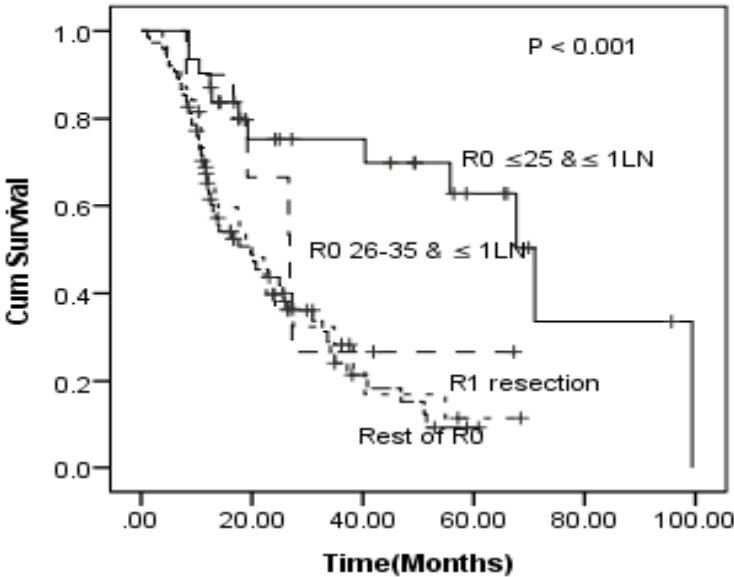

|                                                 | <b>Survival (Months)</b><br>Median(95%CI)<br>Mean ± SD(95%CI) |
|-------------------------------------------------|---------------------------------------------------------------|
| <b>R0 resection ≤25mm and ≤ 1LN</b><br>N= 30    | 70.9 (54.0, 87.9)<br>63.1 ± 8.0 (47.3,78.4)                   |
| <b>R0 resection 26-35 mm and ≤ 1LN</b><br>N= 10 | 26.8(16..9, 36.6)<br>33.7 ± 7.4 (19.2,48.2)                   |
| <b>Rest of R0</b><br>N=65                       | 19.7(10.1, 29.2)<br>25.1 ± 2.5 (20.0,30.2)                    |
| <b>R1 resection</b><br>N=49                     | 17.4(10.0, 25.4)<br>24.3 ± 2.7(18.8,29.7)                     |
| P value                                         | <b>&lt;0.001</b>                                              |
